# Supplementary material for: Molecular engineering of starburst triarylamine donor with selenophene containing π-linker for dye-sensitized solar cells
Source: Royal Society of Chemistry journal article supplement (doi:10.1039/c5tc03308j), 2015-12-23
Supplement: c5tc03308j1.pdf [file c5tc03308j1.pdf]

## **Electronic Supplementary Information**

**For**

**Molecular engineering of starburst triarylamine donor with  
selenophene containing  $\pi$ -linker for dye-sensitized solar cells  
with high open-circuit voltage**

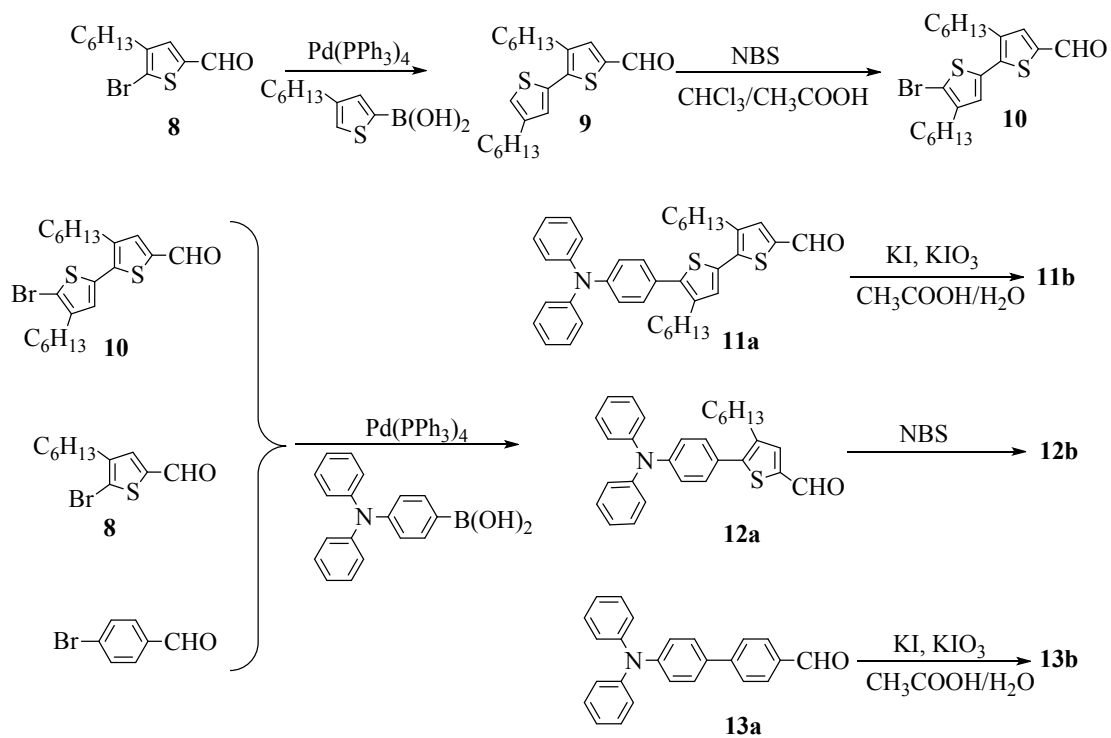

**Scheme S1** Synthetic routes of **11b–13b**.

**Table S1** Calculated energy values (in eV) of HOMO and LUMO for all the dyes

|            | HOMO  | LUMO  |
|------------|-------|-------|
| <b>7a</b>  | -5.41 | -2.84 |
| <b>7b</b>  | -5.11 | -2.86 |
| <b>7c</b>  | -5.35 | -2.84 |
| <b>7d</b>  | -5.07 | -2.83 |
| <b>11d</b> | -5.10 | -2.73 |
| <b>12d</b> | -5.18 | -2.61 |
| <b>13d</b> | -5.14 | -2.55 |

**Table S2** Absorption transitions calculated by the TD-DFT method

|            | state | transition | contribution (%) | E (nm) | oscillator strength |
|------------|-------|------------|------------------|--------|---------------------|
| <b>7a</b>  | S1    | HOMO→LUMO  | 93%              | 574.86 | 1.3404              |
| <b>7b</b>  | S1    | HOMO→LUMO  | 97%              | 640.62 | 0.8164              |
| <b>7c</b>  | S1    | HOMO→LUMO  | 96%              | 583.30 | 1.1880              |
| <b>7d</b>  | S1    | HOMO→LUMO  | 96%              | 641.08 | 0.7104              |
| <b>11d</b> | S1    | HOMO→LUMO  | 98%              | 611.64 | 0.6092              |
| <b>12d</b> | S1    | HOMO→LUMO  | 98%              | 574.41 | 0.5524              |
| <b>13d</b> | S1    | HOMO→LUMO  | 98%              | 560.03 | 0.6013              |

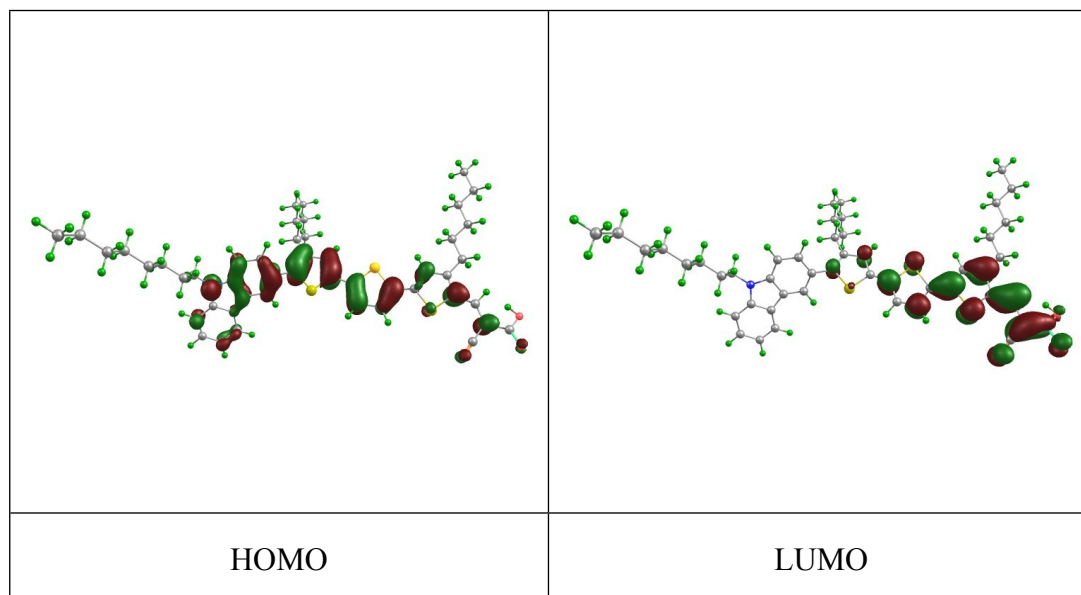**Fig. S1** Contour plots of selected frontier orbitals of **7a**.

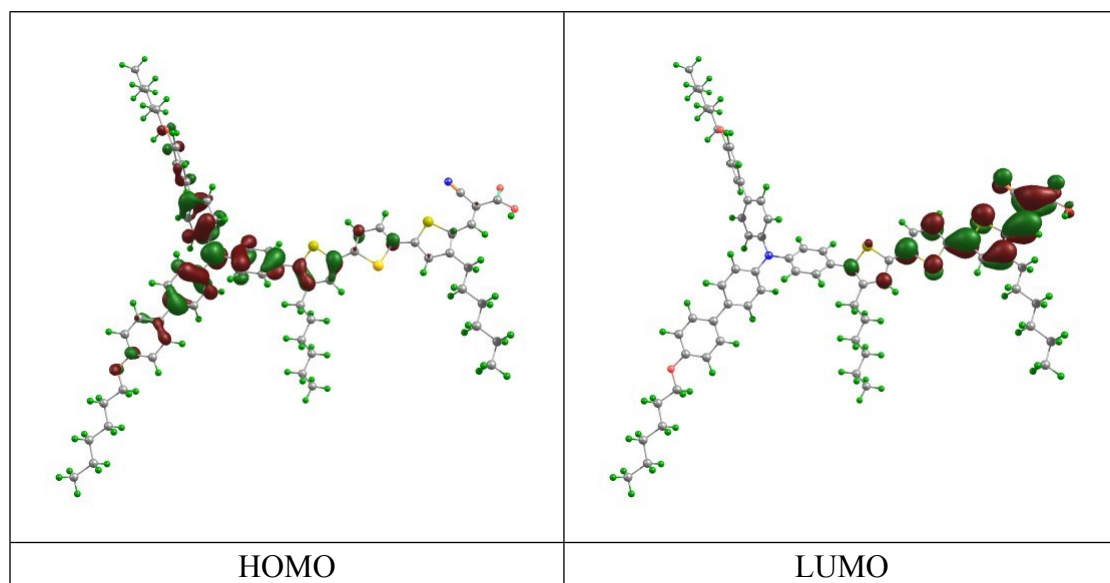

**Fig. S2** Contour plots of selected frontier orbitals of **7b**.

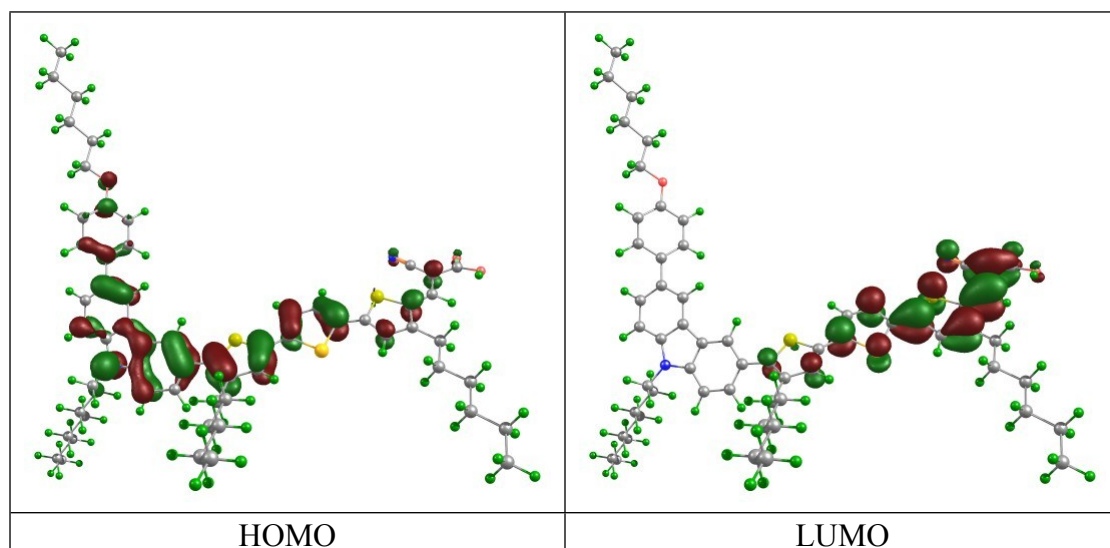

**Fig. S3** Contour plots of selected frontier orbitals of **7c**.

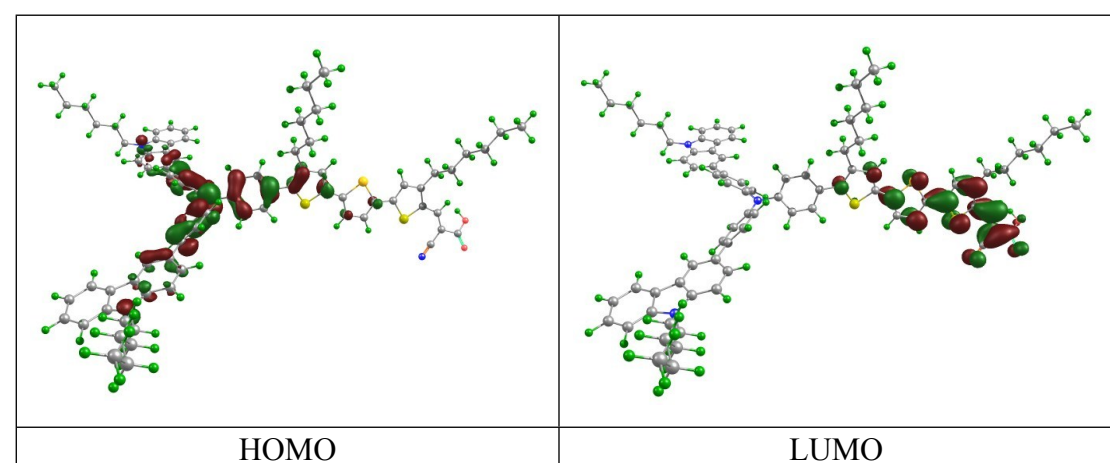

**Fig. S4** Contour plots of selected frontier orbitals of **7d**.

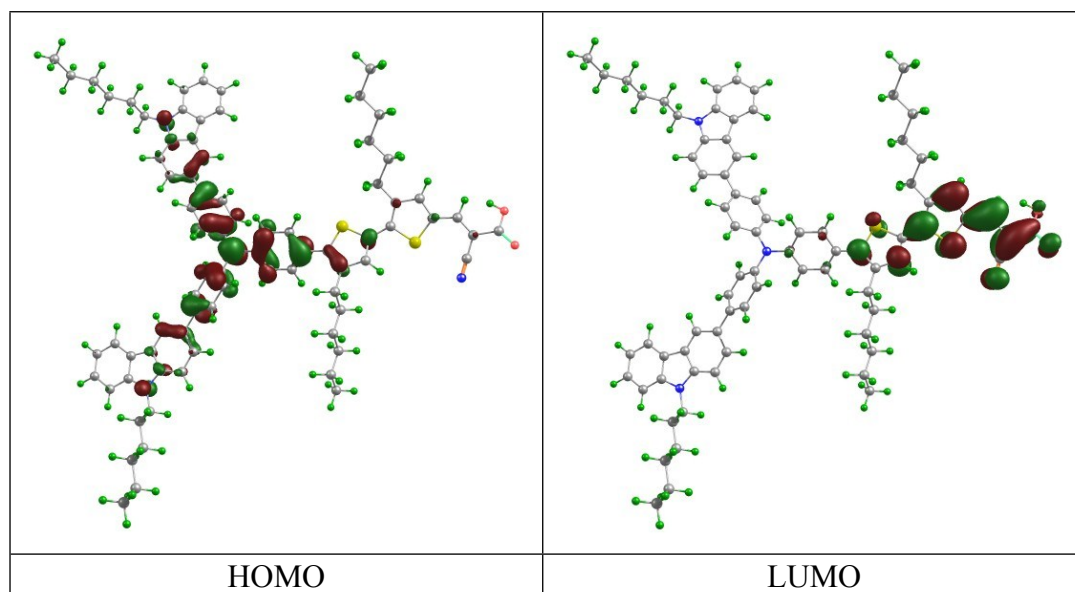

**Fig. S5** Contour plots of selected frontier orbitals of **11d**.

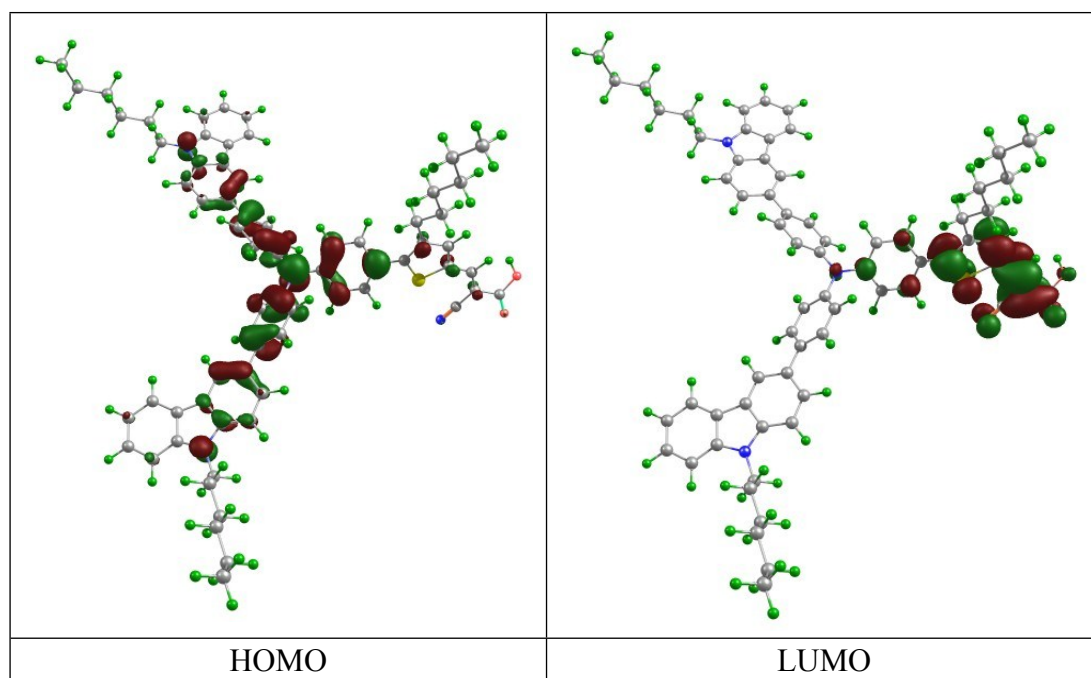

**Fig. S6** Contour plots of selected frontier orbitals of **12d**.

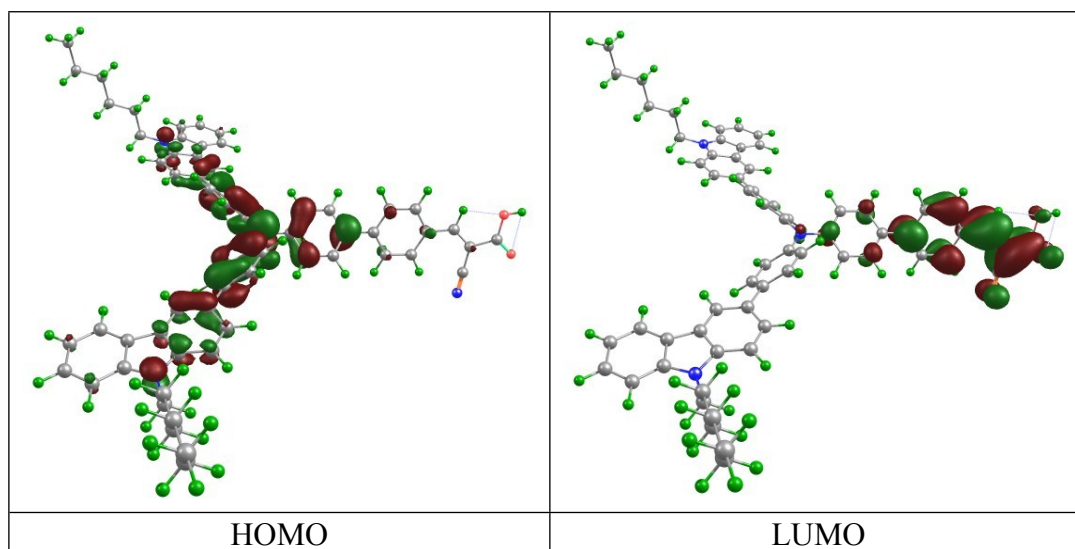

**Fig. S7** Contour plots of selected frontier orbitals of **13d**.

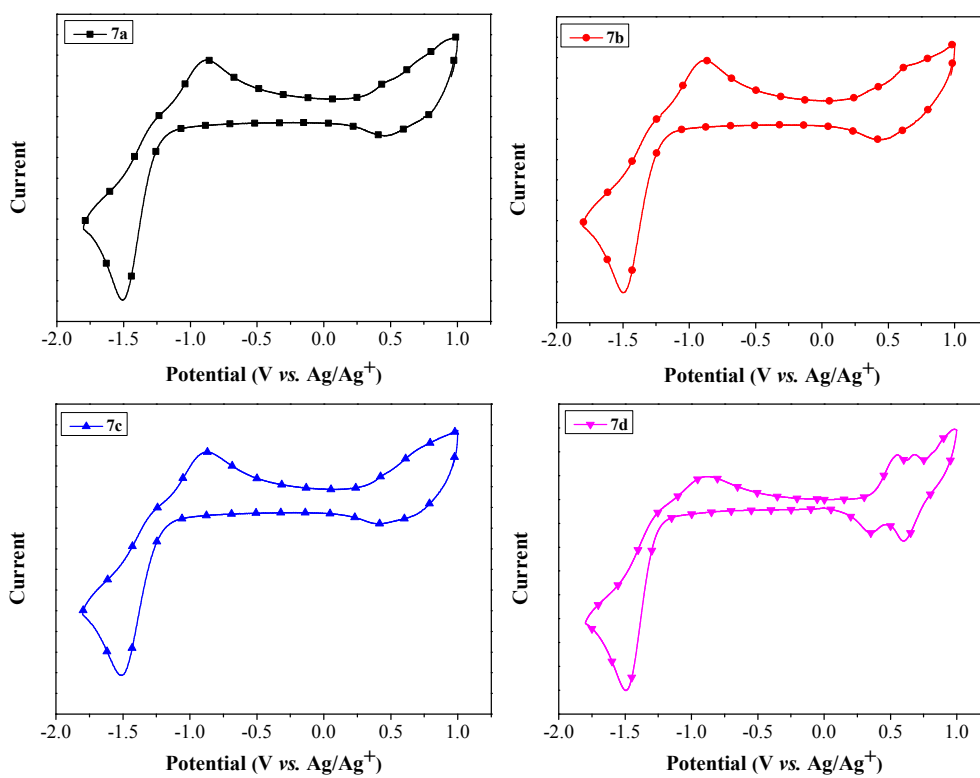

**Fig. S8** Cyclic voltammograms of organic dyes **7a–7d**.

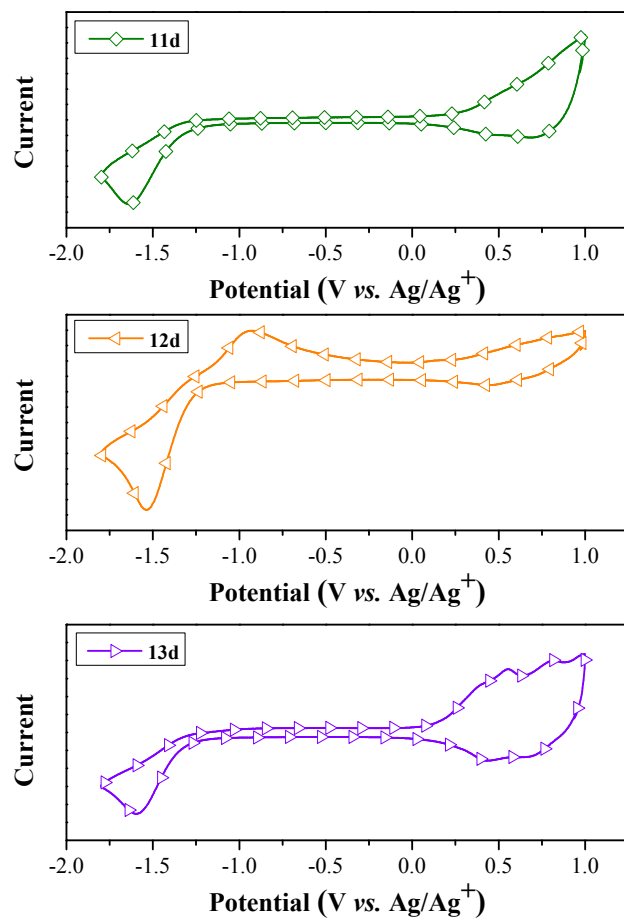

**Fig. S9** Cyclic voltammograms of organic dyes **11d–13d**.
